# Supplementary material for: Evolutionary Genomics of Peach and Almond Domestication
Source: PubMed Central journal article supplement (PMC5144968; doi:10.1534/g3.116.032672), 2016-10-04
Supplement: supp_g3.116.032672_FileS1.pdf [file supp_g3.116.032672_FileS1.pdf]

■ **Table S1** Detailed sample information for *P. dulcis*, *P. persica*, and related species used in analyses.

| Species           | Sample ID                          | Accession and/or Cultivar        | Avg. Depth           | Origin     | Source                   | Ref                      |
|-------------------|------------------------------------|----------------------------------|----------------------|------------|--------------------------|--------------------------|
| <i>P. dulcis</i>  | PD01                               | DPRU 2578.2, #53                 | 30.46                | Ukraine    | SRR4036105 <sup>w</sup>  | 1 <sup>y</sup>           |
|                   | PD02                               | Tardy Nonpareil                  | 34.59                | USA        | SRR4036108 <sup>x</sup>  | 1 <sup>y</sup>           |
|                   | PD03                               | DPRU 1791.3, BE-1609             | 17.93                | Turkey     | SRR4045225 <sup>w</sup>  | 1 <sup>z</sup>           |
|                   | PD04                               | DPRU 2374.12                     | 16.77                | Iran       | SRR4045227 <sup>w</sup>  | 1 <sup>z</sup>           |
|                   | PD05                               | DPRU 1456.4, Badam               | 15.90                | Pakistan   | SRR4045228 <sup>w</sup>  | 1 <sup>z</sup>           |
|                   | PD06                               | DPRU 2301, Tuono                 | 17.23                | Italy      | SRR4045226 <sup>w</sup>  | 1 <sup>z</sup>           |
|                   | PD07                               | DPRU 1462.2                      | 19.38                | Pakistan   | SRR4045229 <sup>w</sup>  | 1 <sup>z</sup>           |
|                   | PD08                               | DPRU 1207.2                      | 14.47                | Uzbekistan | SRR4045222 <sup>w</sup>  | 1 <sup>z</sup>           |
|                   | PD09                               | DPRU 2331.9                      | 17.17                | China      | SRR4045224 <sup>w</sup>  | 1 <sup>z</sup>           |
|                   | PD10                               | DPRU 0210, Languedoc             | 20.63                | France     | SRR4045223 <sup>w</sup>  | 1 <sup>z</sup>           |
|                   | PD11                               | S3067                            | 6.64                 | Spain      | SRR765861                | 2                        |
|                   | PD12                               | D05-187                          | 4.72                 | Spain      | SRR765850                | 2                        |
|                   | PD13                               | Lauranne                         | 13.00                | France     | SRR765838                | 2                        |
|                   | PD14                               | Ramillete                        | 6.69                 | Spain      | SRR765679                | 2                        |
| <i>P. persica</i> | PP02                               | Yumyeong                         | 22.37                | Korea      | SRR502994                | 3                        |
|                   | PP03                               | Shenzhou Mitao                   | 11.19                | N China    | SRR502993,<br>SRR502992  | 3                        |
|                   | PP04                               | Sahua Hong Pantao                | 14.46                | S China    | SRR502991,<br>SRR502990  | 3                        |
|                   | PP05                               | Quetta                           | 12.64                | Pakistan   | SRR502989,<br>SRR502987  | 3                        |
|                   | PP06                               | Oro A                            | 25.78                | Brazil     | SRR502986                | 3                        |
|                   | PP07                               | IF7310828                        | 12.75                | Italy      | SRR503001,<br>SRR503000  | 3                        |
|                   | PP08                               | GF305                            | 18.68                | France     | SRR502983                | 3                        |
|                   | PP09                               | F <sub>1</sub> Contender × Ambra | 15.57                | Italy      | SRR502997                | 3                        |
|                   | PP10                               | Earligold                        | 35.40                | USA        | SRR502996,<br>SRR502995  | 3                        |
|                   | PP11                               | Bolero                           | 22.42                | Italy      | SRR501836                | 3                        |
|                   | PP12                               | F8,1-42                          | 11.88                | USA        | SRR068361                | 4                        |
|                   | PP13                               | Georgia Belle                    | 13.13                | USA        | SRR068359                | 4                        |
|                   | PP14                               | Dr. Davis                        | 14.44                | USA        | SRR068360                | 4                        |
|                   | PP15                               | Lovell                           | 37.36                | USA        | SRR40365107 <sup>x</sup> | 1 <sup>y</sup>           |
|                   | <i>P. cerasifera</i><br>(outgroup) | PC01                             | DPRU 0579, Myrobalan | 35.02      | USA                      | SRR40365106 <sup>w</sup> |

**Source:** newly resequenced samples provided by <sup>w</sup>United States Department of Agriculture National Clonal Germplasm Repository (Davis) or <sup>x</sup>University of California, Davis; **Reference:** <sup>1</sup>this study (resequencing of samples performed at <sup>y</sup>BGI or <sup>z</sup>UC Berkeley), <sup>2</sup>Koepke *et al.* 2013, <sup>3</sup>Verde *et al.* 2013, <sup>4</sup>Ahmad *et al.* 2011

■ **Table S2** RNA-seq data used in expression analyses.

| SRA Run ID | Species | Tissue         | Cultivar    | Reference                            |
|------------|---------|----------------|-------------|--------------------------------------|
| SRR2086434 | Peach   | fruit mesocarp | Red Pearl   | <a href="#">Sanhueza et al. 2015</a> |
| SRR2086433 | Peach   | fruit mesocarp | Red Pearl   | <a href="#">Sanhueza et al. 2015</a> |
| SRR3823906 | Peach   | fruit mesocarp | DU-88       | N/A                                  |
| SRR3823907 | Peach   | fruit mesocarp | DU-88       | N/A                                  |
| SRR2290949 | Peach   | leaf           | Jangtaek    | <a href="#">Jo et al. 2015</a>       |
| SRR2290951 | Peach   | leaf           | Mibaek      | <a href="#">Jo et al. 2015</a>       |
| SRR1662173 | Peach   | leaf           | Hongyetao   | <a href="#">Wang et al. 2013</a>     |
| SRR1662174 | Peach   | leaf           | Mantianhong | <a href="#">Wang et al. 2013</a>     |
| SRR2976060 | Almond  | ovary          | genotype H  | <a href="#">Mousavi et al. 2014</a>  |
| SRR2976058 | Almond  | anther         | genotype H  | <a href="#">Mousavi et al. 2014</a>  |

N/A: unable to locate a publication for this data submitted to SRA by the Andres Bello Universidad

■ **Table S3** Inbreeding values of peach and almond samples.

| <b>Peach</b> | <i>F</i>     | <b>Almond</b> | <i>F</i>     |
|--------------|--------------|---------------|--------------|
| PP02         | 0.072        | PD02          | 0.000        |
| PP03         | 0.222        | PD03          | 0.002        |
| PP04         | 0.116        | PD04          | 0.000        |
| PP05         | 0.001        | PD05          | 0.002        |
| PP06         | 0.533        | PD06          | 0.000        |
| PP07         | 0.081        | PD07          | 0.000        |
| PP08         | 0.737        | PD08          | 0.000        |
| PP09         | 0.000        | PD09          | 0.000        |
| PP10         | 0.064        | PD10          | 0.000        |
| PP11         | 0.000        | PD11          | 0.000        |
| PP13         | 0.000        | PD12          | 0.027        |
| PP14         | 0.176        | PD13          | 0.000        |
| PP15         | 0.557        | PD14          | 0.000        |
| <i>Mean</i>  | <i>0.197</i> | <i>Mean</i>   | <i>0.002</i> |

■ **Table S4** Mean  $F_{ST}$ , diversity statistics, and neutrality test values.

| Region    | $F_{ST}$ | Almond                     |        |        |        | Peach                      |        |        |       |
|-----------|----------|----------------------------|--------|--------|--------|----------------------------|--------|--------|-------|
|           |          | $\theta_{\pi} \times 10^3$ | $D$    | $H$    | $E$    | $\theta_{\pi} \times 10^3$ | $D$    | $H$    | $E$   |
| genome    | 0.586    | 18.374                     | -1.150 | -0.115 | -0.223 | 2.700                      | -0.492 | -0.561 | 0.139 |
| genic     | 0.606    | 10.570                     | -1.489 | -0.030 | -0.351 | 1.667                      | -0.510 | -0.497 | 0.101 |
| non-genic | 0.568    | 25.668                     | -0.834 | -0.195 | -0.103 | 3.611                      | -0.476 | -0.617 | 0.173 |
| Chr 1     | 0.605    | 16.706                     | -1.266 | -0.154 | -0.231 | 2.022                      | -0.559 | -0.513 | 0.096 |
| Chr 2     | 0.557    | 20.222                     | -1.094 | -0.081 | -0.227 | 4.014                      | -0.462 | -0.579 | 0.158 |
| Chr 3     | 0.593    | 16.858                     | -1.130 | -0.116 | -0.217 | 2.455                      | -0.417 | -0.557 | 0.155 |
| Chr 4     | 0.558    | 21.779                     | -0.994 | -0.110 | -0.187 | 3.707                      | -0.326 | -0.565 | 0.186 |
| Chr 5     | 0.589    | 17.602                     | -1.184 | -0.092 | -0.243 | 2.352                      | -0.544 | -0.593 | 0.139 |
| Chr 6     | 0.611    | 16.042                     | -1.177 | -0.125 | -0.225 | 2.121                      | -0.512 | -0.533 | 0.119 |
| Chr 7     | 0.586    | 18.793                     | -1.166 | -0.105 | -0.232 | 2.613                      | -0.461 | -0.575 | 0.154 |
| Chr 8     | 0.575    | 19.972                     | -1.119 | -0.097 | -0.225 | 2.593                      | -0.651 | -0.635 | 0.137 |

■ **Table S5** Significant GO terms for  $F_{ST}$  candidate genes based on top 5% quantile. (Type: F - molecular function; P - biological process)

| GO acc     | Type | Term                                                            | Query Item | BG Item | p-value | FDR     |
|------------|------|-----------------------------------------------------------------|------------|---------|---------|---------|
| GO:0030554 | F    | adenyl nucleotide binding                                       | 153        | 2225    | 7.7e-07 | 9.3e-05 |
| GO:0005524 | F    | ATP binding                                                     | 146        | 2104    | 8.8e-07 | 9.3e-05 |
| GO:0005515 | F    | protein binding                                                 | 122        | 1634    | 2.5e-07 | 9.3e-05 |
| GO:0001883 | F    | purine nucleoside binding                                       | 153        | 2225    | 7.7e-07 | 9.3e-05 |
| GO:0001882 | F    | nucleoside binding                                              | 153        | 2226    | 7.9e-07 | 9.3e-05 |
| GO:0032559 | F    | adenyl ribonucleotide binding                                   | 146        | 2104    | 8.8e-07 | 9.3e-05 |
| GO:0017076 | F    | purine nucleotide binding                                       | 162        | 2437    | 2.3e-06 | 0.00017 |
| GO:0016772 | F    | transferase activity, transferring phosphorus-containing groups | 101        | 1347    | 2.4e-06 | 0.00017 |
| GO:0032555 | F    | purine ribonucleotide binding                                   | 155        | 2313    | 2.6e-06 | 0.00017 |
| GO:0032553 | F    | ribonucleotide binding                                          | 155        | 2313    | 2.6e-06 | 0.00017 |
| GO:0000166 | F    | nucleotide binding                                              | 165        | 2531    | 5.4e-06 | 0.00031 |
| GO:0004713 | F    | protein tyrosine kinase activity                                | 62         | 751     | 1.7e-05 | 0.00077 |
| GO:0016798 | F    | hydrolase activity, acting on glycosyl bonds                    | 37         | 363     | 1.6e-05 | 0.00077 |
| GO:0004553 | F    | hydrolase activity, hydrolyzing O-glycosyl compounds            | 36         | 348     | 1.6e-05 | 0.00077 |
| GO:0004888 | F    | transmembrane receptor activity                                 | 26         | 213     | 1.9e-05 | 0.00082 |
| GO:0004872 | F    | receptor activity                                               | 26         | 215     | 2.2e-05 | 0.00089 |
| GO:0060089 | F    | molecular transducer activity                                   | 31         | 285     | 2.5e-05 | 0.0009  |
| GO:0004871 | F    | signal transducer activity                                      | 31         | 285     | 2.5e-05 | 0.0009  |
| GO:0016740 | F    | transferase activity                                            | 137        | 2103    | 3.7e-05 | 0.0013  |
| GO:0003964 | F    | RNA-directed DNA polymerase activity                            | 16         | 101     | 5.1e-05 | 0.0016  |
| GO:0034061 | F    | DNA polymerase activity                                         | 17         | 115     | 6.5e-05 | 0.002   |
| GO:0016265 | P    | death                                                           | 38         | 377     | 1.6e-05 | 0.0042  |
| GO:0012501 | P    | programmed cell death                                           | 36         | 357     | 2.6e-05 | 0.0042  |
| GO:0023052 | P    | signaling                                                       | 45         | 486     | 2e-05   | 0.0042  |
| GO:0008219 | P    | cell death                                                      | 38         | 377     | 1.6e-05 | 0.0042  |
| GO:0006915 | P    | apoptosis                                                       | 36         | 357     | 2.6e-05 | 0.0042  |
| GO:0006278 | P    | RNA-dependent DNA replication                                   | 16         | 101     | 5.1e-05 | 0.0068  |
| GO:0016773 | F    | phosphotransferase activity, alcohol group as acceptor          | 75         | 1072    | 0.00035 | 0.0097  |
| GO:0003824 | F    | catalytic activity                                              | 344        | 6355    | 0.00034 | 0.0097  |
| GO:0016779 | F    | nucleotidyltransferase activity                                 | 23         | 217     | 0.00037 | 0.01    |
| GO:0004672 | F    | protein kinase activity                                         | 70         | 989     | 0.0004  | 0.01    |
| GO:0006260 | P    | DNA replication                                                 | 19         | 150     | 0.00016 | 0.01    |
| GO:0002376 | P    | immune system process                                           | 20         | 165     | 0.00018 | 0.015   |
| GO:0006955 | P    | immune response                                                 | 20         | 165     | 0.00018 | 0.015   |
| GO:0045087 | P    | innate immune response                                          | 20         | 165     | 0.00018 | 0.015   |
| GO:0016301 | F    | kinase activity                                                 | 74         | 1089    | 0.00082 | 0.02    |
| GO:0023046 | P    | signaling process                                               | 36         | 409     | 0.00032 | 0.021   |

Continued on next page

Table S5 – continued from previous page

| GO acc     | Type | Term                 | Query Item | BG Item | p-value | FDR   |
|------------|------|----------------------|------------|---------|---------|-------|
| GO:0023060 | P    | signal transmission  | 36         | 409     | 0.00032 | 0.021 |
| GO:0005488 | F    | binding              | 371        | 7025    | 0.0011  | 0.025 |
| GO:0005215 | F    | transporter activity | 50         | 682     | 0.0013  | 0.03  |
| GO:0007165 | P    | signal transduction  | 33         | 378     | 0.00063 | 0.039 |
| GO:0007154 | P    | cell communication   | 14         | 107     | 0.00083 | 0.048 |

■ **Table S6** Number and mean summary statistic values of non-genic and genic windows (NGW and GW, respectively) in the lowest 5% quantile for Tajima's D, Zeng's E, Fay & Wu's H, and  $\theta_\pi$  for each species. The same information is shown for windows in the top and bottom 5% quantiles for  $F_{ST}$ . Also included are the number of genes represented by genic windows and the ratio of genic to non-genic windows.

| Statistic    |           | NGW    | Mean       | GW     | Genes | Mean       | GW:NGW  |
|--------------|-----------|--------|------------|--------|-------|------------|---------|
| Tajima's D   | almond    | 17112  | -2.3015    | 203826 | 10365 | -2.3302    | 11.9113 |
|              | peach     | 126724 | -2.0946    | 93781  | 6000  | -2.0870    | 0.7400  |
| Zeng's E     | almond    | 12969  | -0.6501    | 195992 | 11385 | -0.6606    | 15.1123 |
|              | peach     | 81258  | -0.5535    | 129763 | 10706 | -0.5494    | 1.5969  |
| Fay & Wu's H | almond    | 127429 | -1.0246    | 38095  | 4029  | -1.0325    | 0.2990  |
|              | peach     | 107582 | -2.9458    | 105573 | 8526  | -3.0076    | 0.9813  |
| $\theta_\pi$ | almond    | 13360  | 0.0033     | 188322 | 9647  | 0.0035     | 14.0960 |
|              | peach     | 58287  | 8.6123e-06 | 124818 | 9927  | 7.3075e-06 | 2.1414  |
| $F_{ST}$     | top 5%    | 73406  | 0.8716     | 88596  | 7400  | 0.8587     | 1.2069  |
|              | bottom 5% | 51018  | 0.1739     | 35688  | 4692  | 0.1622     | 0.6995  |

■ **Table S7** Mann-Whitney U (MWU) and  $\chi^2$  tests for significance of RNAseq specificity and tissue specific expression of peach fruit, peach leaf, almond ovary, or almond anther and candidate status.

| <b>Tissue</b>          | <b>Test</b> | <b>F<sub>ST</sub></b>                    | <b>Almond</b>                            | <b>Peach</b>                             |
|------------------------|-------------|------------------------------------------|------------------------------------------|------------------------------------------|
|                        |             |                                          | <b>E</b>                                 | <b>E</b>                                 |
| <b>Fruit (peach)</b>   | $\chi^2$    | 0.1284                                   | <u>0.0052</u>                            | 0.0530                                   |
|                        | MWU         | <u>0.0423</u>                            | 0.1109                                   | 0.0987                                   |
| <b>Leaf (peach)</b>    | $\chi^2$    | <u><math>1.362 \times 10^{-9}</math></u> | <u><math>1.52 \times 10^{-15}</math></u> | <u><math>6.779 \times 10^{-4}</math></u> |
|                        | MWU         | <u><math>3.653 \times 10^{-4}</math></u> | 0.1642                                   | 0.1216                                   |
| <b>Ovary (almond)</b>  | $\chi^2$    | 0.909                                    | <u>0.0150</u>                            | <u>0.0074</u>                            |
|                        | MWU         | 0.6004                                   | 0.3680                                   | 0.6040                                   |
| <b>Anther (almond)</b> | $\chi^2$    | 0.7448                                   | <u>0.0014</u>                            | 0.0921                                   |
|                        | MWU         | 0.4083                                   | 0.6753                                   | 0.5490                                   |



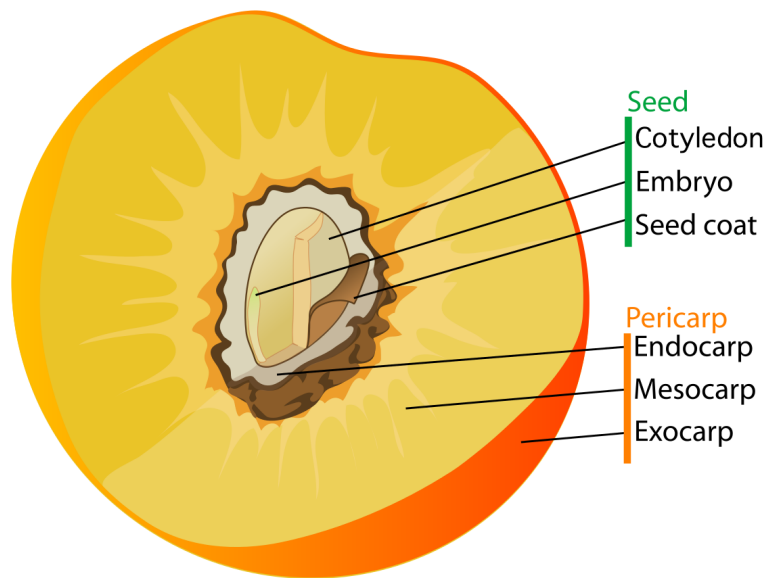

**Figure S1** Peach and almond fruit and seed anatomy.

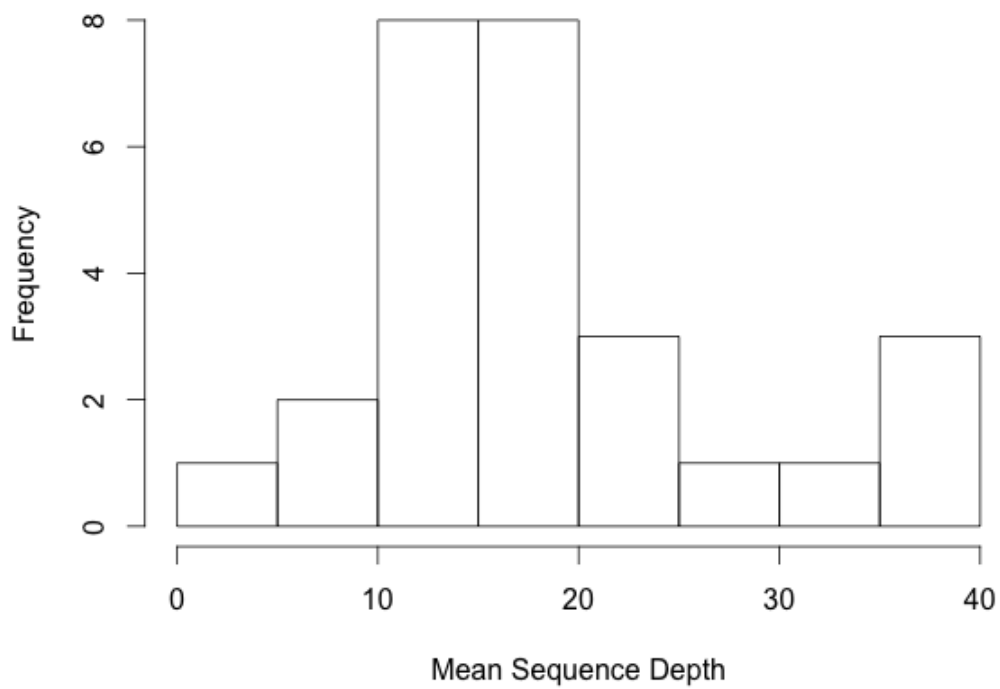

**Figure S2** Mean mapped depth of peach and almond sequences used in this analysis filtered for mapping quality (MAPQ) scores  $\geq 30$  and base quality scores  $\geq 20$ .

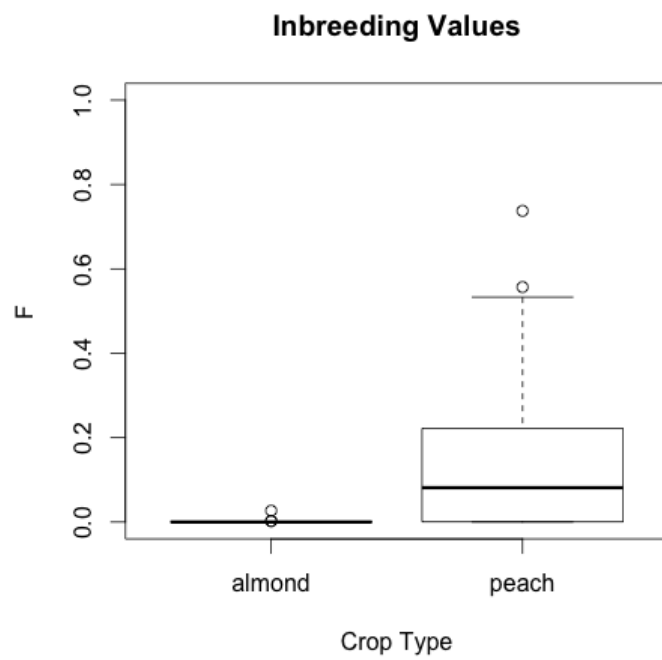

**Figure S3** Distribution of inbreeding values for almond and peach samples studied.

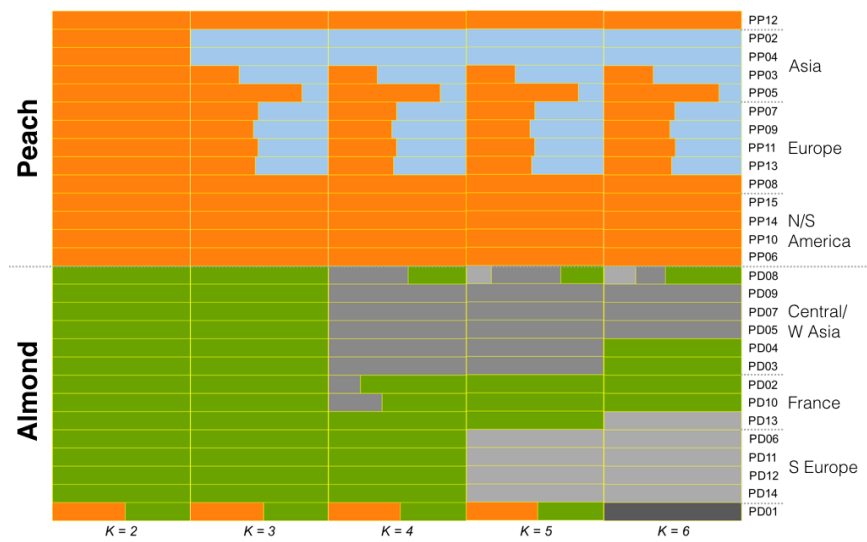

**Figure S4** Increasing the assumed clusters to  $K=6$  (right) places PD01, the almond-peach  $F_1$  hybrid collected from Kharkiv Market, Ukraine, into a unique sub-population. It also shifts the assignments of samples PD13, PD03, and PD04 to different sub-populations, when compared to their assignments in  $K=5$  (second from right).

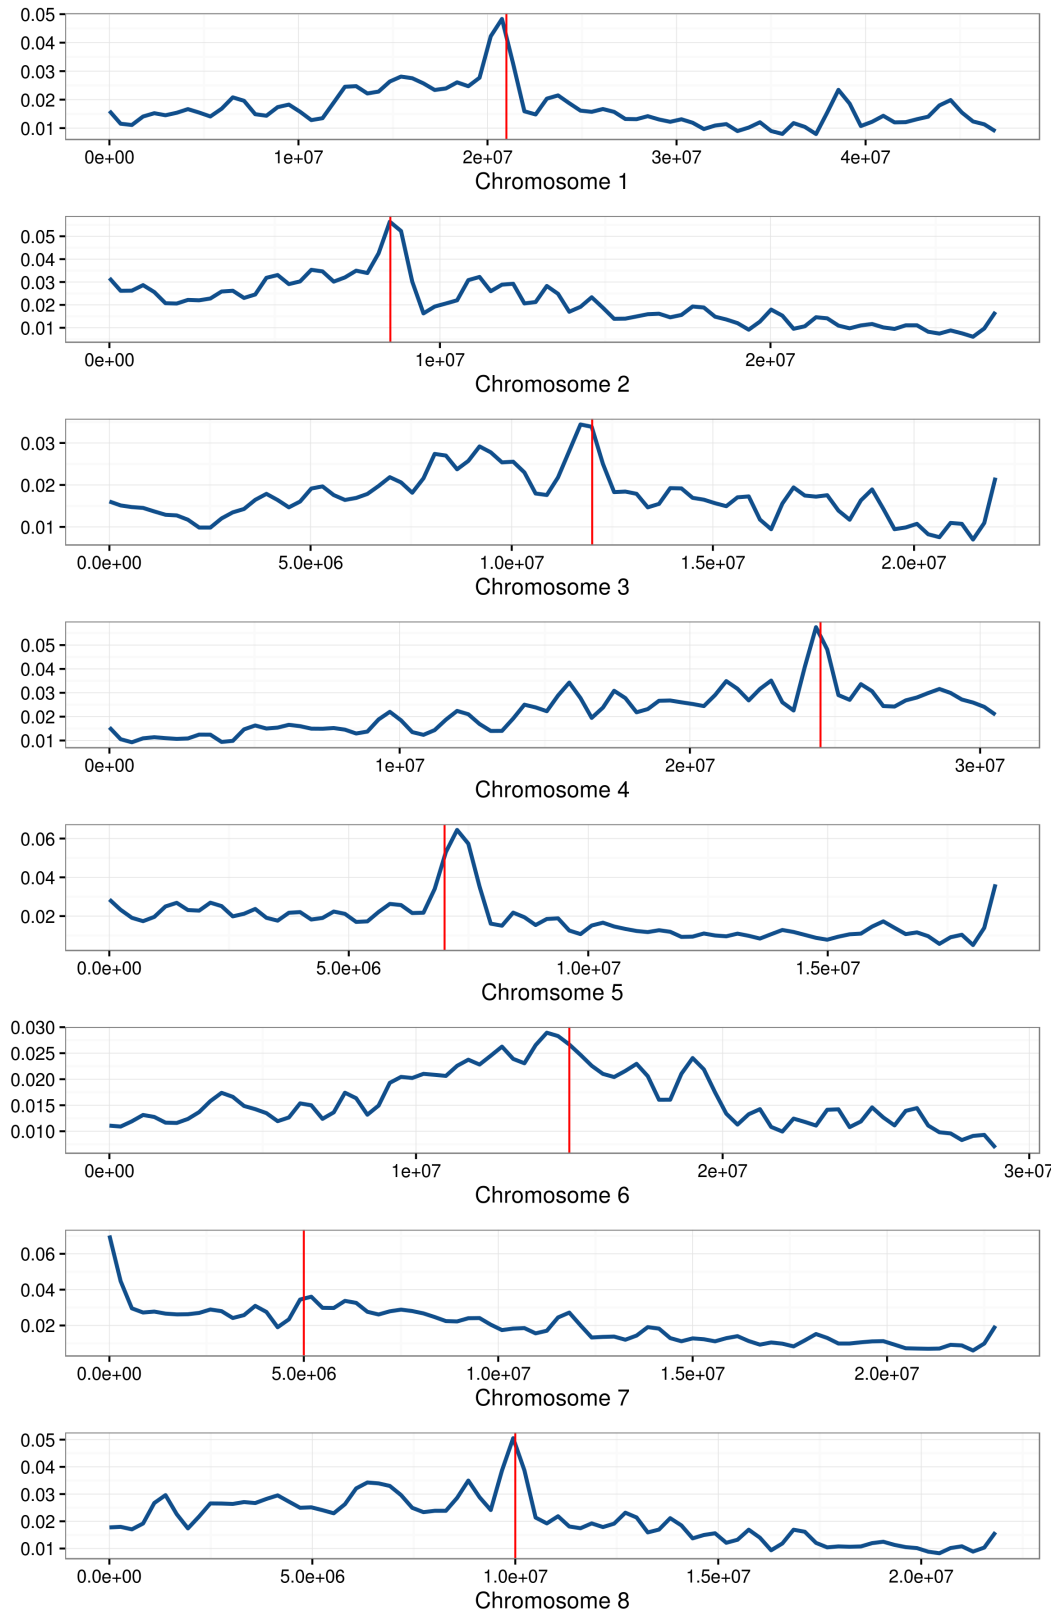

**Figure S5** Nucleotide diversity ( $\theta_{\pi}$ ) in almond for each chromosome. The vertical red line indicates the approximate location of the centromere.

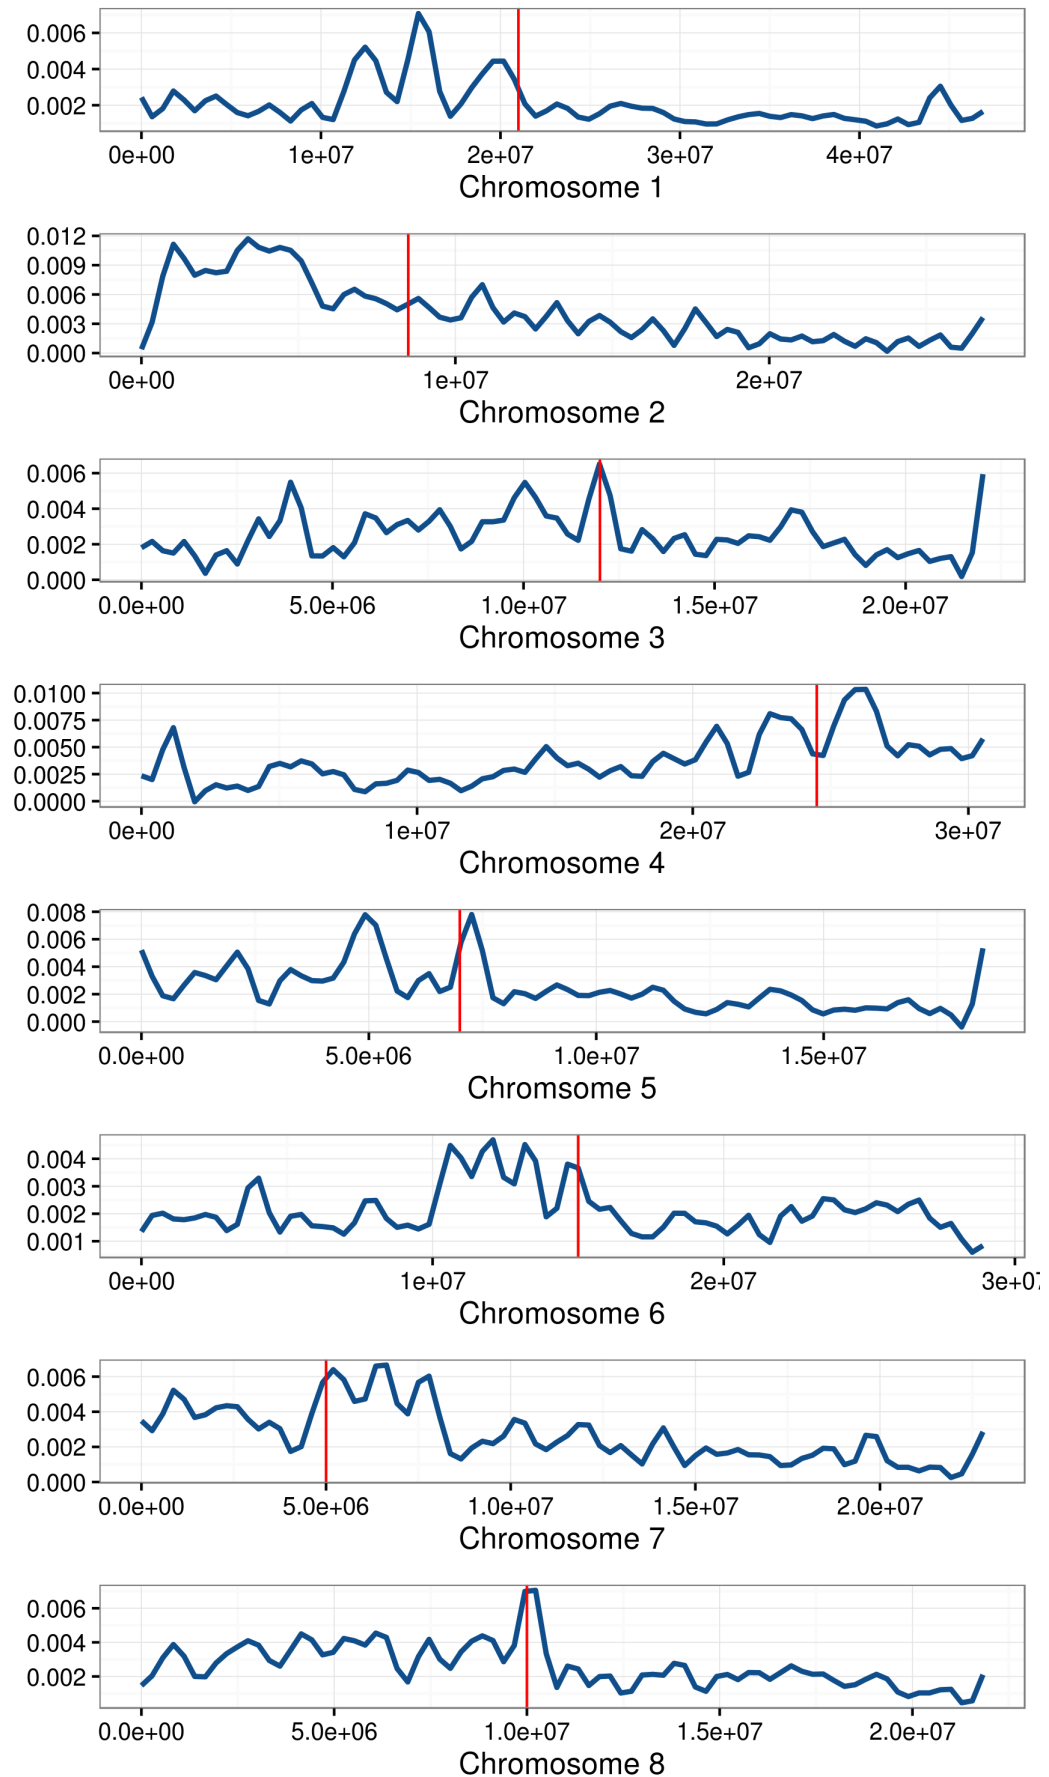

**Figure S6** Nucleotide diversity ( $\theta_{\pi}$ ) in peach for each chromosome. The vertical red line indicates the approximate location of the centromere.

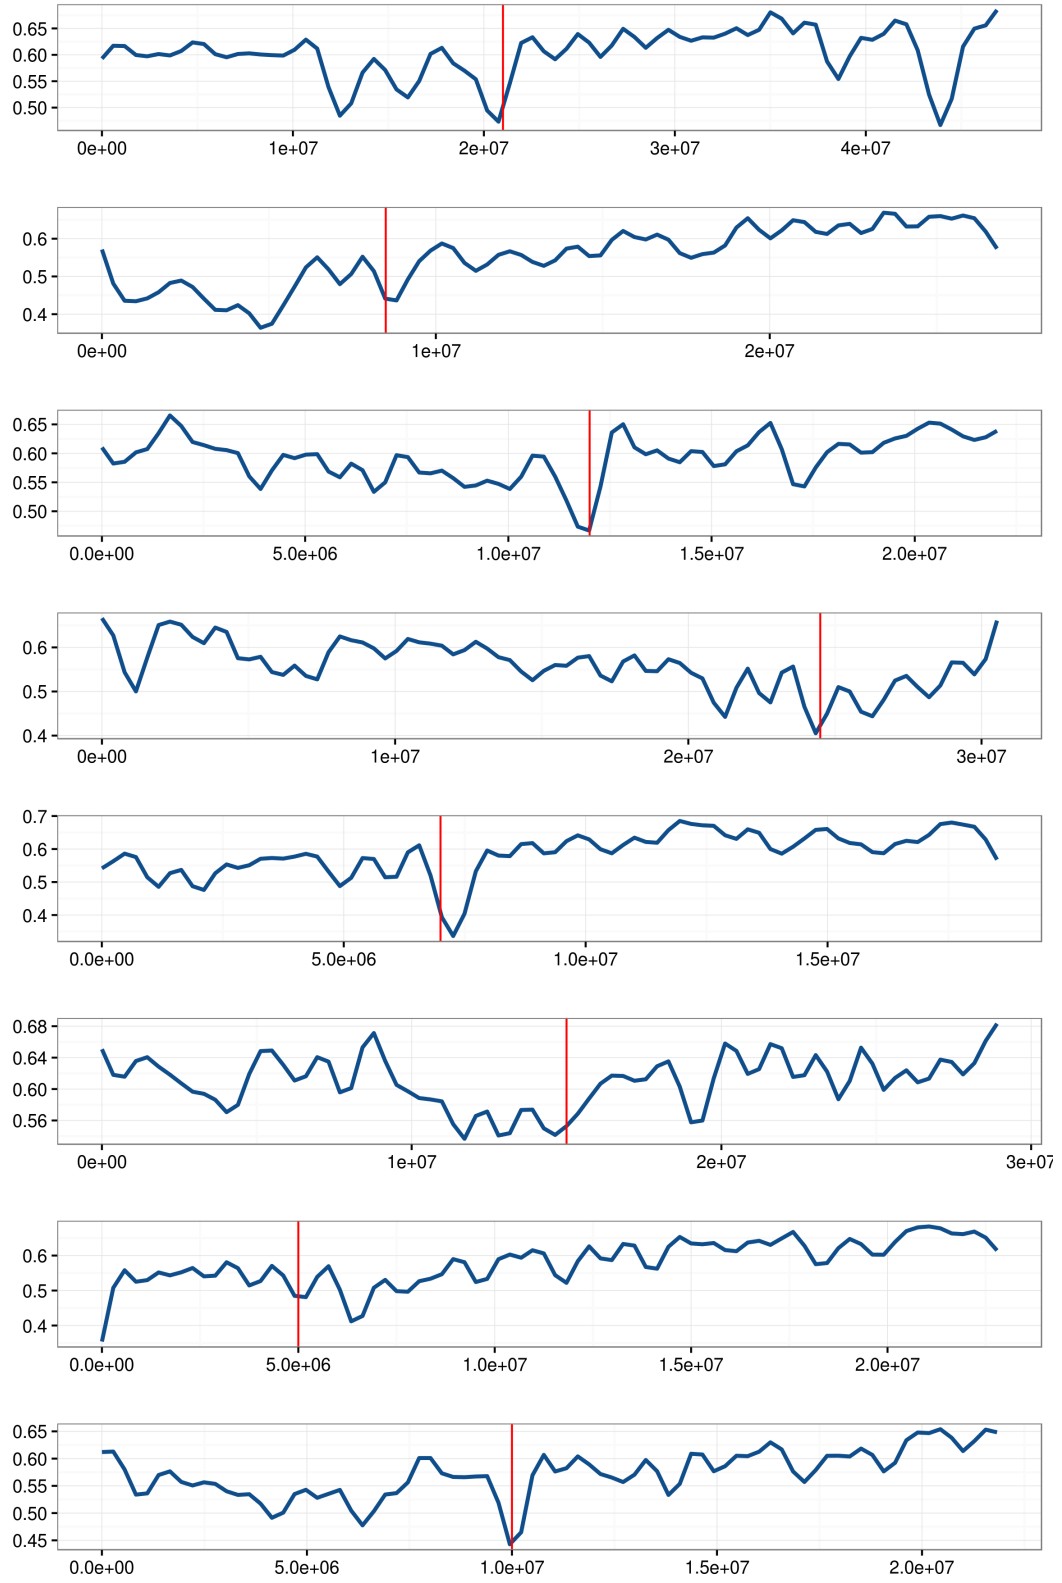

**Figure S7**  $F_{ST}$  between almond and peach for each chromosome. The vertical red line indicates the approximate location of the centromere.

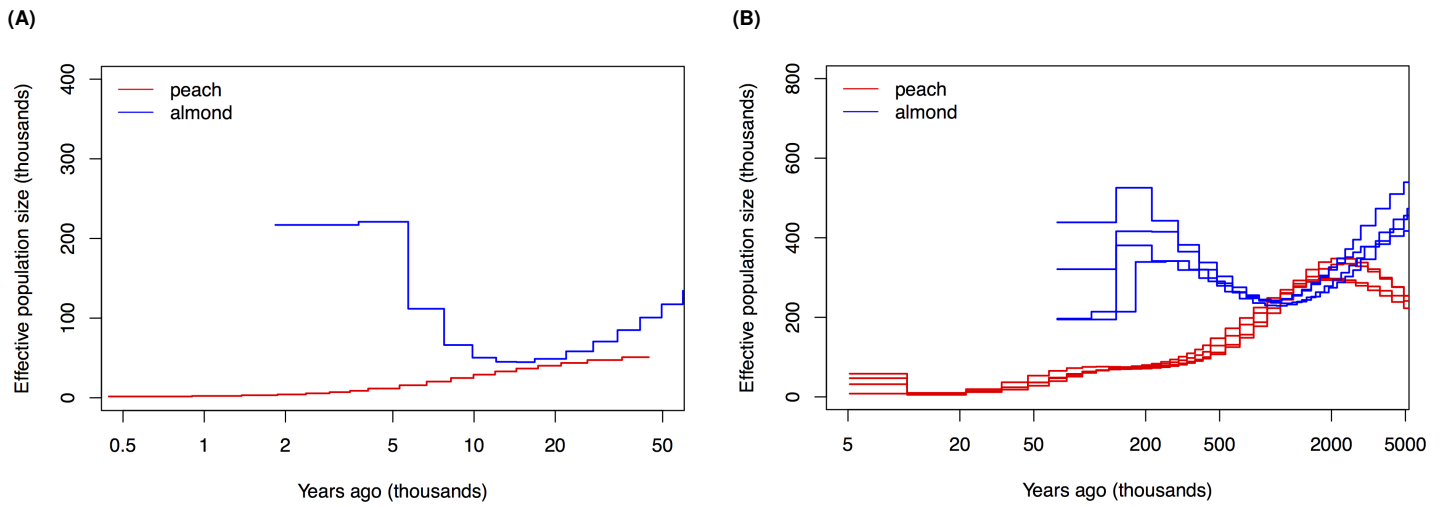

**Figure S8** Historical changes in  $N_e$  over time in both almond and peach. Shown are estimates of  $N_e$  for both the (A) recent ( $\leq 50 \times 10^3$  BP) and (B) ancient ( $\leq 5000 \times 10^3$  BP) past.
