# Supplementary material for: Evolutionary Genomics of Peach and Almond Domestication
Source: PubMed Central journal article supplement (PMC5144968; doi:10.1534/g3.116.032672), 2016-10-04
Supplement: supp_g3.116.032672_TableS1.pdf [file supp_g3.116.032672_TableS1.pdf]

■ **Table S1** Detailed sample information for *P. dulcis*, *P. persica*, and related species used in analyses.

| Species           | Sample ID                          | Accession and/or Cultivar        | Avg. Depth           | Origin     | Source                   | Ref                      |
|-------------------|------------------------------------|----------------------------------|----------------------|------------|--------------------------|--------------------------|
| <i>P. dulcis</i>  | PD01                               | DPRU 2578.2, #53                 | 30.46                | Ukraine    | SRR4036105 <sup>w</sup>  | 1 <sup>y</sup>           |
|                   | PD02                               | Tardy Nonpareil                  | 34.59                | USA        | SRR4036108 <sup>x</sup>  | 1 <sup>y</sup>           |
|                   | PD03                               | DPRU 1791.3, BE-1609             | 17.93                | Turkey     | SRR4045225 <sup>w</sup>  | 1 <sup>z</sup>           |
|                   | PD04                               | DPRU 2374.12                     | 16.77                | Iran       | SRR4045227 <sup>w</sup>  | 1 <sup>z</sup>           |
|                   | PD05                               | DPRU 1456.4, Badam               | 15.90                | Pakistan   | SRR4045228 <sup>w</sup>  | 1 <sup>z</sup>           |
|                   | PD06                               | DPRU 2301, Tuono                 | 17.23                | Italy      | SRR4045226 <sup>w</sup>  | 1 <sup>z</sup>           |
|                   | PD07                               | DPRU 1462.2                      | 19.38                | Pakistan   | SRR4045229 <sup>w</sup>  | 1 <sup>z</sup>           |
|                   | PD08                               | DPRU 1207.2                      | 14.47                | Uzbekistan | SRR4045222 <sup>w</sup>  | 1 <sup>z</sup>           |
|                   | PD09                               | DPRU 2331.9                      | 17.17                | China      | SRR4045224 <sup>w</sup>  | 1 <sup>z</sup>           |
|                   | PD10                               | DPRU 0210, Languedoc             | 20.63                | France     | SRR4045223 <sup>w</sup>  | 1 <sup>z</sup>           |
|                   | PD11                               | S3067                            | 6.64                 | Spain      | SRR765861                | 2                        |
|                   | PD12                               | D05-187                          | 4.72                 | Spain      | SRR765850                | 2                        |
|                   | PD13                               | Lauranne                         | 13.00                | France     | SRR765838                | 2                        |
|                   | PD14                               | Ramillete                        | 6.69                 | Spain      | SRR765679                | 2                        |
| <i>P. persica</i> | PP02                               | Yumyeong                         | 22.37                | Korea      | SRR502994                | 3                        |
|                   | PP03                               | Shenzhou Mitao                   | 11.19                | N China    | SRR502993,<br>SRR502992  | 3                        |
|                   | PP04                               | Sahua Hong Pantao                | 14.46                | S China    | SRR502991,<br>SRR502990  | 3                        |
|                   | PP05                               | Quetta                           | 12.64                | Pakistan   | SRR502989,<br>SRR502987  | 3                        |
|                   | PP06                               | Oro A                            | 25.78                | Brazil     | SRR502986                | 3                        |
|                   | PP07                               | IF7310828                        | 12.75                | Italy      | SRR503001,<br>SRR503000  | 3                        |
|                   | PP08                               | GF305                            | 18.68                | France     | SRR502983                | 3                        |
|                   | PP09                               | F <sub>1</sub> Contender × Ambra | 15.57                | Italy      | SRR502997                | 3                        |
|                   | PP10                               | Earligold                        | 35.40                | USA        | SRR502996,<br>SRR502995  | 3                        |
|                   | PP11                               | Bolero                           | 22.42                | Italy      | SRR501836                | 3                        |
|                   | PP12                               | F8,1-42                          | 11.88                | USA        | SRR068361                | 4                        |
|                   | PP13                               | Georgia Belle                    | 13.13                | USA        | SRR068359                | 4                        |
|                   | PP14                               | Dr. Davis                        | 14.44                | USA        | SRR068360                | 4                        |
|                   | PP15                               | Lovell                           | 37.36                | USA        | SRR40365107 <sup>x</sup> | 1 <sup>y</sup>           |
|                   | <i>P. cerasifera</i><br>(outgroup) | PC01                             | DPRU 0579, Myrobalan | 35.02      | USA                      | SRR40365106 <sup>w</sup> |

**Source:** newly resequenced samples provided by <sup>w</sup>United States Department of Agriculture National Clonal Germplasm Repository (Davis) or <sup>x</sup>University of California, Davis; **Reference:** <sup>1</sup>this study (resequencing of samples performed at <sup>y</sup>BGI or <sup>z</sup>UC Berkeley), <sup>2</sup>Koepke *et al.* 2013, <sup>3</sup>Verde *et al.* 2013, <sup>4</sup>Ahmad *et al.* 2011
