# Supplementary material for: Evolutionary Genomics of Peach and Almond Domestication
Source: PubMed Central journal article supplement (PMC5144968; doi:10.1534/g3.116.032672), 2016-10-04
Supplement: supp_g3.116.032672_TableS2.pdf [file supp_g3.116.032672_TableS2.pdf]

■ **Table S2** RNA-seq data used in expression analyses.

| SRA Run ID | Species | Tissue         | Cultivar    | Reference                            |
|------------|---------|----------------|-------------|--------------------------------------|
| SRR2086434 | Peach   | fruit mesocarp | Red Pearl   | <a href="#">Sanhueza et al. 2015</a> |
| SRR2086433 | Peach   | fruit mesocarp | Red Pearl   | <a href="#">Sanhueza et al. 2015</a> |
| SRR3823906 | Peach   | fruit mesocarp | DU-88       | N/A                                  |
| SRR3823907 | Peach   | fruit mesocarp | DU-88       | N/A                                  |
| SRR2290949 | Peach   | leaf           | Jangtaek    | <a href="#">Jo et al. 2015</a>       |
| SRR2290951 | Peach   | leaf           | Mibaek      | <a href="#">Jo et al. 2015</a>       |
| SRR1662173 | Peach   | leaf           | Hongyetao   | <a href="#">Wang et al. 2013</a>     |
| SRR1662174 | Peach   | leaf           | Mantianhong | <a href="#">Wang et al. 2013</a>     |
| SRR2976060 | Almond  | ovary          | genotype H  | <a href="#">Mousavi et al. 2014</a>  |
| SRR2976058 | Almond  | anther         | genotype H  | <a href="#">Mousavi et al. 2014</a>  |

N/A: unable to locate a publication for this data submitted to SRA by the Andres Bello Universidad
