# Supplementary material for: Evolutionary Genomics of Peach and Almond Domestication
Source: PubMed Central journal article supplement (PMC5144968; doi:10.1534/g3.116.032672), 2016-10-04
Supplement: supp_g3.116.032672_TableS3.pdf [file supp_g3.116.032672_TableS3.pdf]

■ **Table S3** Inbreeding values of peach and almond samples.

| <b>Peach</b> | <i>F</i>     | <b>Almond</b> | <i>F</i>     |
|--------------|--------------|---------------|--------------|
| PP02         | 0.072        | PD02          | 0.000        |
| PP03         | 0.222        | PD03          | 0.002        |
| PP04         | 0.116        | PD04          | 0.000        |
| PP05         | 0.001        | PD05          | 0.002        |
| PP06         | 0.533        | PD06          | 0.000        |
| PP07         | 0.081        | PD07          | 0.000        |
| PP08         | 0.737        | PD08          | 0.000        |
| PP09         | 0.000        | PD09          | 0.000        |
| PP10         | 0.064        | PD10          | 0.000        |
| PP11         | 0.000        | PD11          | 0.000        |
| PP13         | 0.000        | PD12          | 0.027        |
| PP14         | 0.176        | PD13          | 0.000        |
| PP15         | 0.557        | PD14          | 0.000        |
| <i>Mean</i>  | <i>0.197</i> | <i>Mean</i>   | <i>0.002</i> |
